# Supplementary material for: Abnormal DNA methylation pattern and expression of DNA methyltransferase 1 promote synovitis and bone destruction in rheumatoid arthritis
Source: Research Square preprint supplement (doi:10.21203/rs.3.rs-8601364/v1), 2026-01-22
Supplement: Supplementary file 2 [file 408fd1188ad9c05768e3f3f2.docx]

| **Supplementary Table**  **96 differentially expressed genes regulated by DNA methylation** | | | | |
| --- | --- | --- | --- | --- |
| **symbol** | **METH_deltaBeta** | **METH_P.Value** | **RNAseq_logFC** | **RNAseq_pvalue** |
| ABLIM1 | 0.182444744 | 0.002881438 | 3.696456113 | 0.000190532 |
| AC008764.1 | 0.134747715 | 0.009212127 | -12.86951481 | 5.20E-06 |
| ACKR3 | 0.197633239 | 0.004900919 | 2.240870134 | 0.00116056 |
| ADAM9 | 0.178091967 | 0.003807144 | 1.449538216 | 0.000163085 |
| ADAMTS3 | 0.260357949 | 0.004517291 | 4.105459857 | 2.07E-05 |
| ADAMTSL2 | -0.159953396 | 0.008061475 | 12.043025 | 0.000734477 |
| ADAMTSL3 | -0.201838068 | 0.004736929 | 10.31052947 | 0.000257567 |
| ADARB1 | 0.138723934 | 0.002477931 | 2.719604431 | 0.000249869 |
| AEBP1 | 0.126699708 | 0.001537689 | 2.238274602 | 0.001095196 |
| AP1S1 | -0.133945517 | 0.009215735 | -1.029192048 | 0.00030707 |
| ATP2A3 | -0.109420111 | 0.00233653 | -1.862338684 | 0.001347555 |
| BMP4 | -0.13860028 | 0.007774132 | 2.720843221 | 0.000674098 |
| BRIP1 | 0.135791923 | 0.005120776 | -1.835382026 | 0.001427572 |
| C1GALT1 | 0.101865319 | 0.001159942 | 2.01232192 | 0.000110807 |
| CACNB4 | 0.205092366 | 0.003862827 | 2.899949193 | 0.000138428 |
| CGNL1 | 0.107369524 | 0.003551991 | 3.927498287 | 0.000717001 |
| CLDN14 | 0.249059918 | 0.000702058 | -3.863934575 | 4.03E-07 |
| CLIC6 | -0.176118901 | 0.004213909 | 3.484034725 | 0.000870224 |
| COL12A1 | -0.112766449 | 0.000441384 | 3.147454763 | 2.81E-06 |
| COL15A1 | -0.158556777 | 0.007112713 | 5.935733517 | 1.99E-09 |
| CORO2B | 0.115830201 | 0.000604375 | 2.904126799 | 3.74E-05 |
| DAB2IP | 0.159889175 | 0.007710476 | 2.282020399 | 0.000371745 |
| DENND3 | 0.104743947 | 0.007568813 | 2.117087843 | 0.001549805 |
| DMD | 0.147347333 | 0.003140002 | 2.608812397 | 0.00051047 |
| DNER | -0.182213486 | 0.000824442 | -3.178337312 | 4.58E-13 |
| DPYSL3 | 0.108838242 | 0.002822292 | 2.022672581 | 0.000181069 |
| DSE | -0.209480045 | 0.001614479 | 1.677118256 | 0.001334995 |
| DSP | 0.163160845 | 0.002468256 | -1.613272574 | 4.19E-05 |
| EBF1 | 0.152782924 | 0.003342273 | 2.064242326 | 0.001575822 |
| EFHD1 | 0.133855659 | 0.006656203 | 12.65255521 | 1.85E-05 |
| EHBP1 | -0.195373253 | 0.001718294 | 2.033643735 | 0.000246803 |
| ELFN1 | 0.418985539 | 0.005321267 | 3.814063149 | 0.00010542 |
| FABP3 | 0.114428076 | 0.00300747 | 2.781691618 | 1.09E-06 |
| FERMT2 | 0.113671351 | 0.001494435 | 1.302716846 | 0.001727933 |
| FGF10 | 0.144038363 | 0.002911591 | 4.742390217 | 5.14E-10 |
| FMN1 | -0.519254119 | 0.001727106 | 2.157245178 | 1.16E-08 |
| FRMD4B | 0.235670684 | 0.002807715 | 4.49138183 | 0.000414977 |
| GCNT1 | -0.158106834 | 0.008187354 | 2.189126959 | 0.001103623 |
| GDF15 | 0.117734703 | 0.00593371 | -1.365328158 | 0.000379853 |
| GRIP2 | 0.230906862 | 0.009130078 | 10.17300247 | 0.000976743 |
| HCK | -0.156836598 | 0.005836651 | 4.015426602 | 0.001246002 |
| ICAM2 | -0.188222595 | 0.008443168 | -2.596216863 | 4.60E-07 |
| IGF1 | 0.106868208 | 0.008852965 | 4.091381733 | 0.001613359 |
| ISG20 | 0.230063723 | 0.008355534 | 3.251399901 | 0.000287693 |
| ITGB2 | -0.117043805 | 0.001397174 | 3.674907438 | 0.000235726 |
| KAZN | 0.20889861 | 0.006433736 | 2.158274358 | 5.19E-06 |
| KCND3 | -0.109605243 | 0.000574838 | 6.000188607 | 5.30E-09 |
| LRIG3 | 0.18303566 | 0.001002583 | 1.753127322 | 0.000642665 |
| LRRC8E | 0.104037036 | 0.007886291 | 4.308543869 | 1.74E-18 |
| LSAMP | -0.158355306 | 0.001943434 | 2.52656027 | 0.000745167 |
| MAGI1 | 0.178826488 | 0.004983553 | 1.333429185 | 0.000736906 |
| MASP1 | -0.1600948 | 0.000407558 | 3.266058697 | 0.00032601 |
| MBP | 0.100171148 | 0.008203048 | 3.148404178 | 0.001325393 |
| MCF2L | -0.125684315 | 0.008204332 | 4.428892817 | 9.50E-05 |
| MYH10 | -0.227935141 | 0.007805971 | 3.209758813 | 1.01E-11 |
| MYRIP | -0.121349793 | 0.003937824 | 2.945151078 | 5.51E-05 |
| NDEL1 | -0.489292949 | 0.000686841 | 1.555966326 | 0.000612035 |
| NTRK2 | -0.225901738 | 0.006423704 | 4.736964841 | 2.71E-08 |
| OLFML2A | 0.136165523 | 0.001664591 | 4.220645143 | 2.25E-06 |
| OPCML | 0.23770148 | 0.001670072 | -12.02189262 | 2.39E-08 |
| PARM1 | 0.126345607 | 0.00138952 | -2.13816767 | 1.11E-06 |
| PDE1A | 0.133056691 | 9.48E-05 | 2.659039612 | 0.00156292 |
| PDGFRA | 0.13219821 | 0.002381785 | 2.993694476 | 2.94E-07 |
| PI16 | 0.248384762 | 0.000158012 | 7.21562577 | 1.89E-11 |
| PKD2 | -0.330081052 | 0.000392983 | 2.916879716 | 5.81E-05 |
| PLXNA2 | 0.108038193 | 0.000124716 | 3.029802855 | 0.001123005 |
| PODXL2 | 0.247364619 | 0.000530533 | -1.793225096 | 1.32E-09 |
| PPP1R14C | -0.220566228 | 0.00690518 | 2.970879137 | 4.31E-09 |
| PRR5L | 0.110269456 | 0.003288821 | 2.15911927 | 2.14E-05 |
| PRTFDC1 | 0.146201274 | 0.001955178 | 1.456729588 | 0.000734713 |
| RAB30 | 0.508288785 | 0.000353229 | 1.845004397 | 4.02E-06 |
| RALGPS1 | 0.34270614 | 0.004677669 | 2.464342813 | 0.001686381 |
| RARB | 0.146237444 | 0.003965963 | -3.600857047 | 3.79E-08 |
| RCAN2 | 0.110299262 | 0.000511246 | 3.549888231 | 7.46E-08 |
| RGMA | -0.15860528 | 0.000388328 | 6.138884621 | 0.000251573 |
| RHOU | 0.253042096 | 0.003977848 | 2.753866952 | 0.000718444 |
| RIPOR2 | -0.103704167 | 0.007242583 | 3.300434337 | 0.000708011 |
| ROR1 | -0.237410859 | 0.008646607 | 2.10145116 | 1.39E-08 |
| RTN4RL1 | -0.16149675 | 0.000180937 | 3.300301261 | 1.54E-06 |
| RUNX1T1 | 0.151530334 | 0.000392158 | 2.67730654 | 0.000320998 |
| SEMA3C | -0.373727777 | 9.24E-05 | 1.90736091 | 0.00167152 |
| SHANK2 | 0.188889994 | 0.007163559 | 3.754391098 | 1.81E-05 |
| SLC12A8 | 0.171981393 | 0.001498066 | 1.979955381 | 0.000423913 |
| SMIM14 | -0.144828442 | 0.008199072 | 1.324849304 | 0.001250892 |
| SMOC2 | -0.328504255 | 0.007470239 | 6.011463217 | 5.57E-08 |
| SNED1 | 0.101639789 | 0.002918874 | 4.913088708 | 6.79E-10 |
| STK38L | 0.182801692 | 0.005510774 | 2.055691573 | 4.61E-05 |
| STMN2 | -0.161267963 | 0.001756713 | 3.011974564 | 2.82E-05 |
| TENM3 | -0.112289983 | 0.001280144 | -1.10763536 | 8.87E-06 |
| TIMP3 | -0.1464965 | 0.005487467 | 4.134986389 | 4.25E-09 |
| TMEM132B | -0.167393602 | 0.004600761 | -3.188385656 | 3.40E-08 |
| TNFSF10 | 0.13840664 | 0.008253984 | 3.772468852 | 0.00142898 |
| TNIP3 | 0.179277815 | 0.002829769 | -1.582485648 | 2.98E-05 |
| TNXB | -0.136222982 | 0.000122104 | 2.533625187 | 7.80E-13 |
| UTRN | -0.110382415 | 0.00659357 | 2.00238825 | 3.33E-07 |
| ZNF521 | 0.358140659 | 0.008158568 | 1.961071309 | 6.16E-05 |
