# Supplementary figures and images for: Abnormal DNA methylation pattern and expression of DNA methyltransferase 1 promote synovitis and bone destruction in rheumatoid arthritis
Source: Research Square preprint supplement (doi:10.21203/rs.3.rs-8601364/v1), 2026-01-22

**WB-DNMT1**


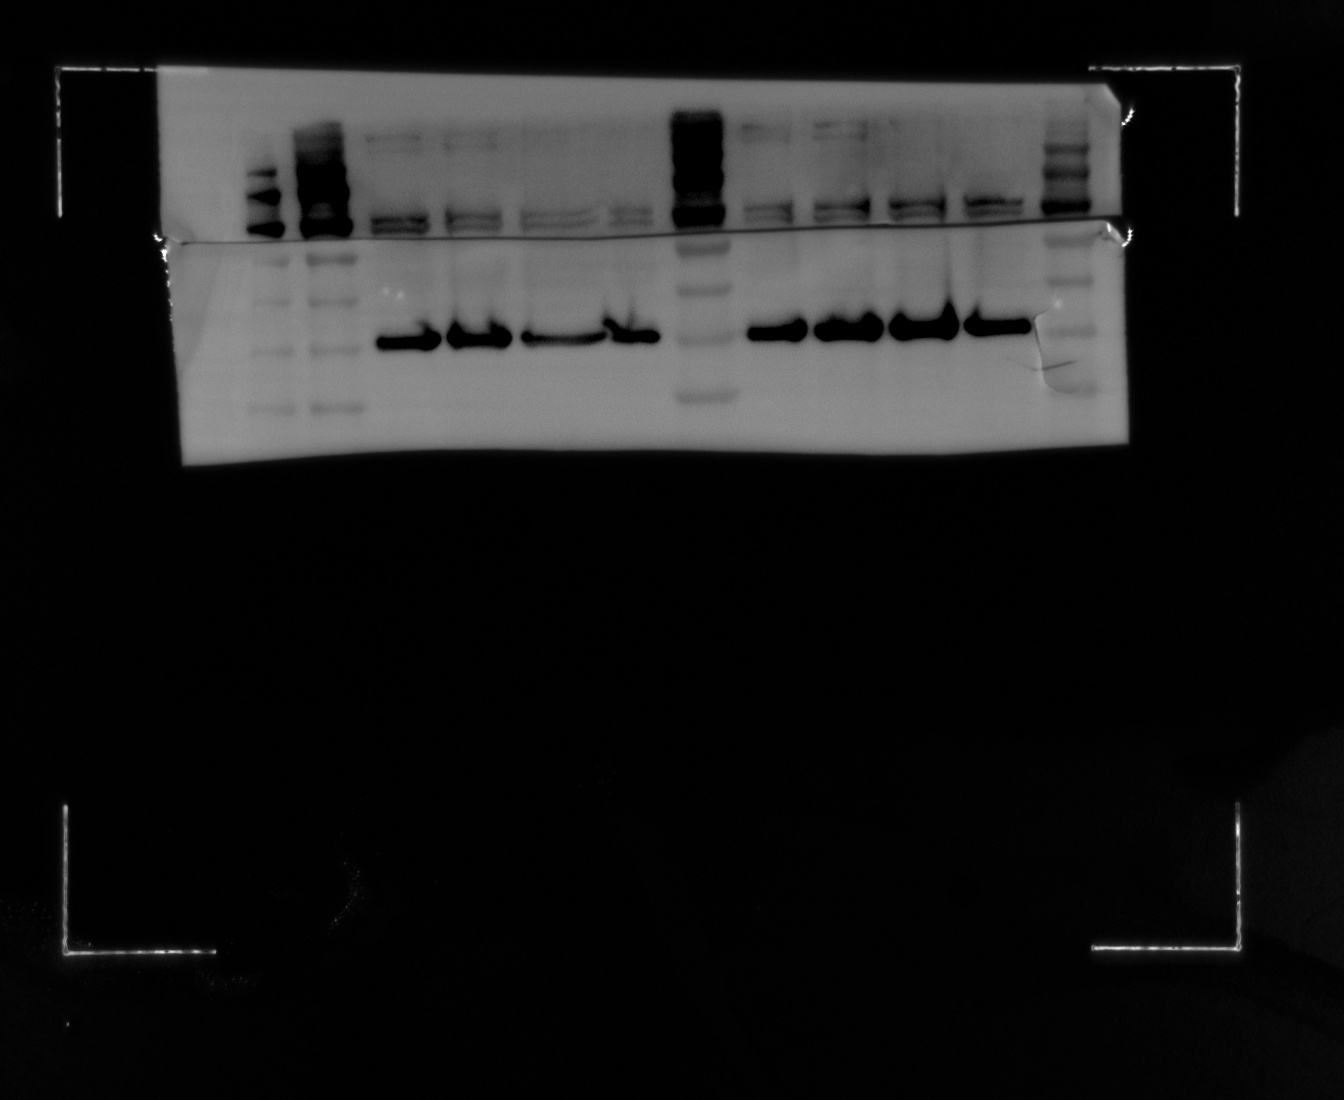

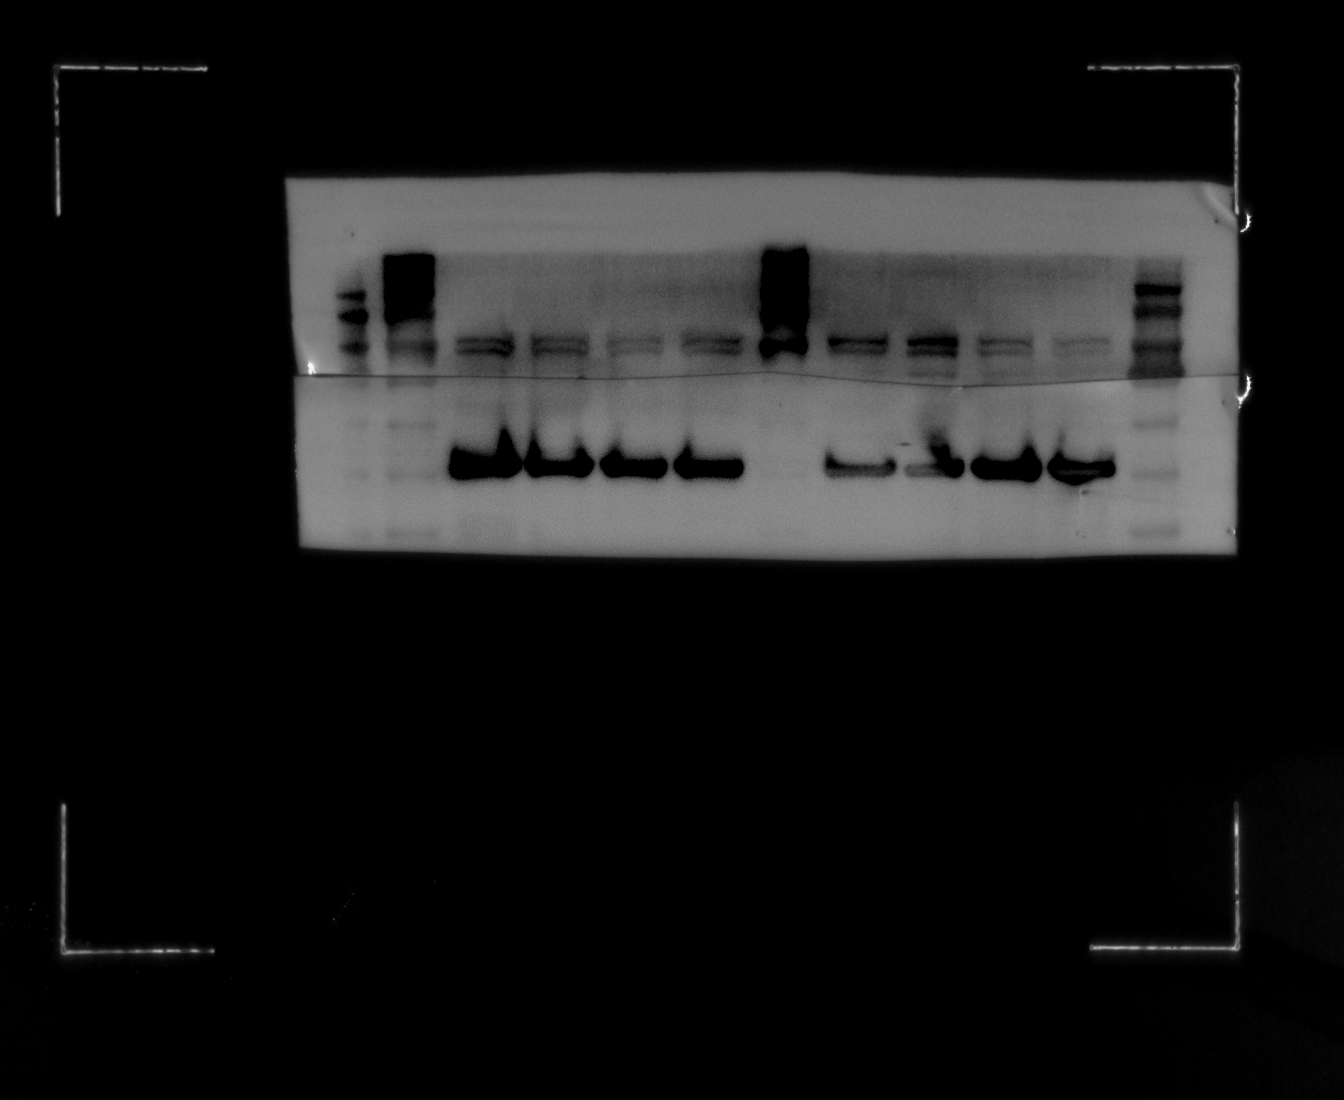


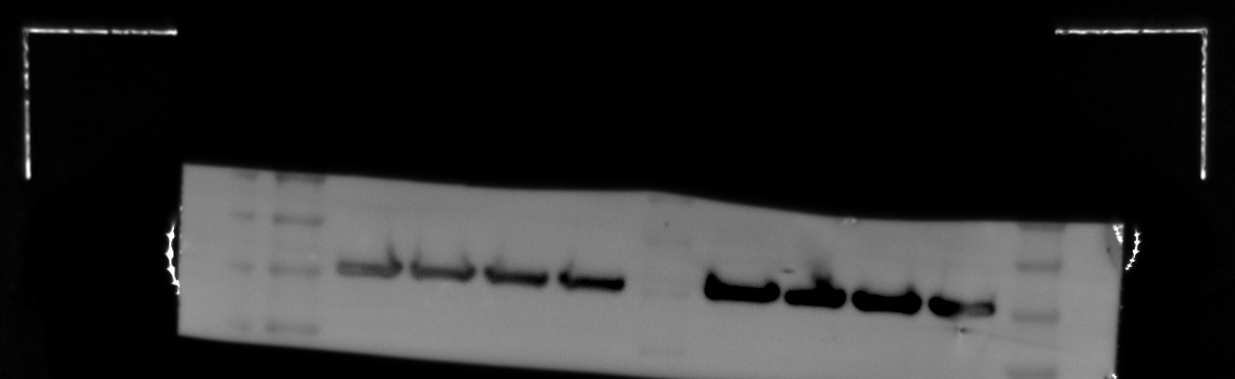
DNMT1 β-actin


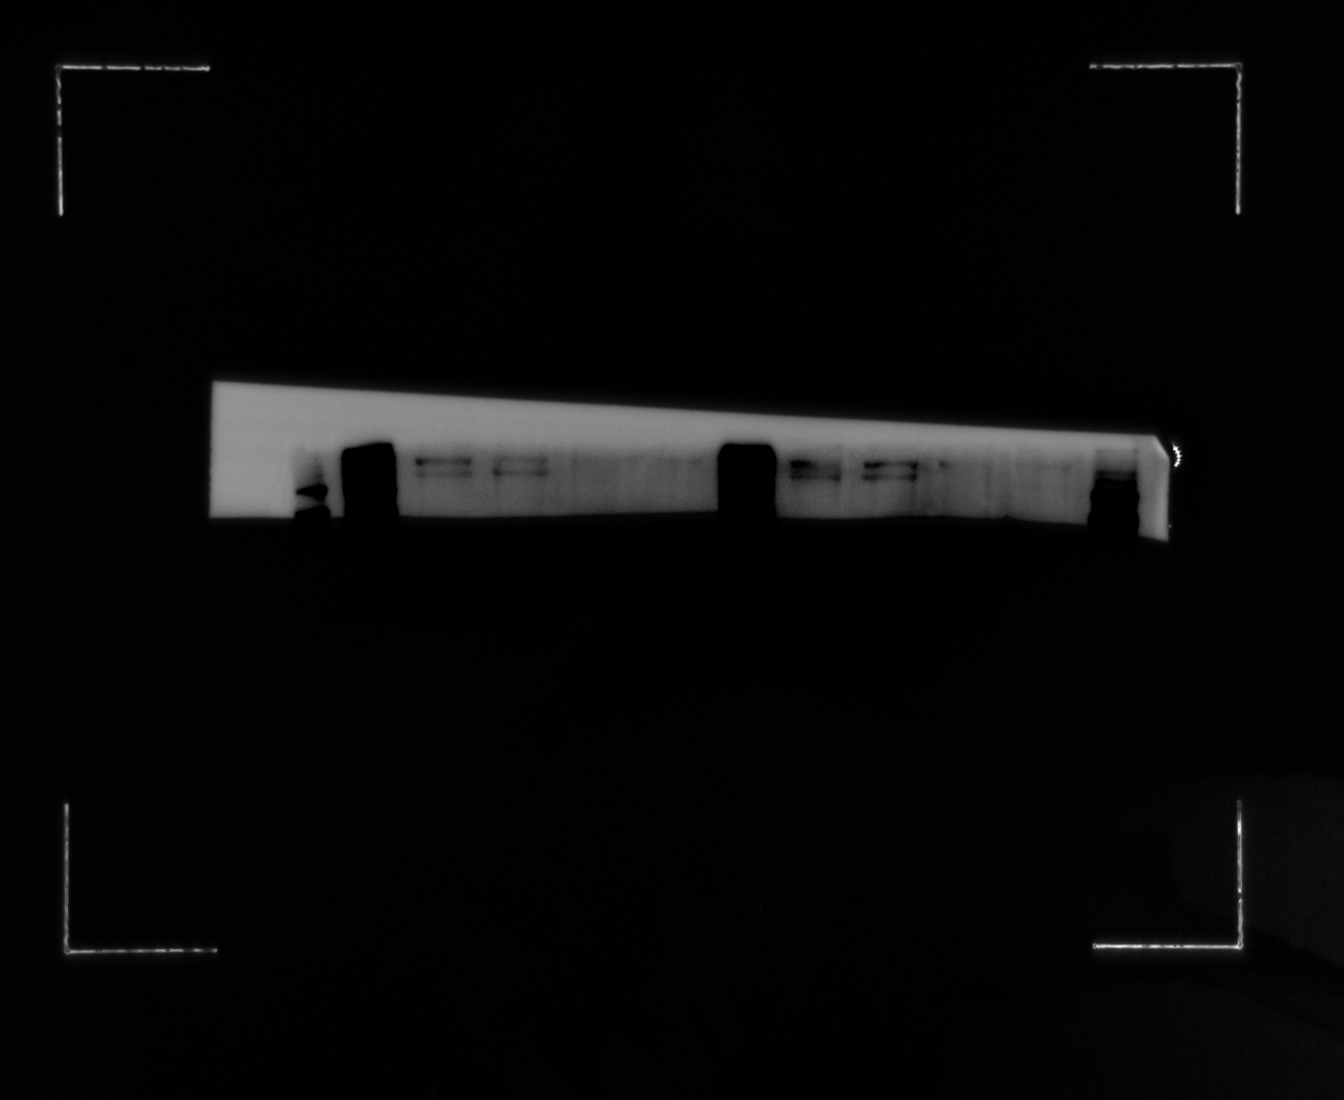


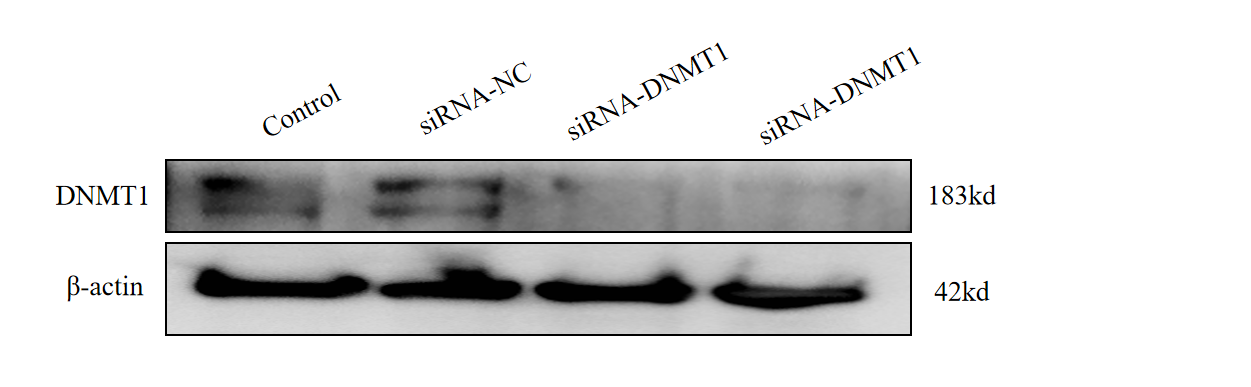


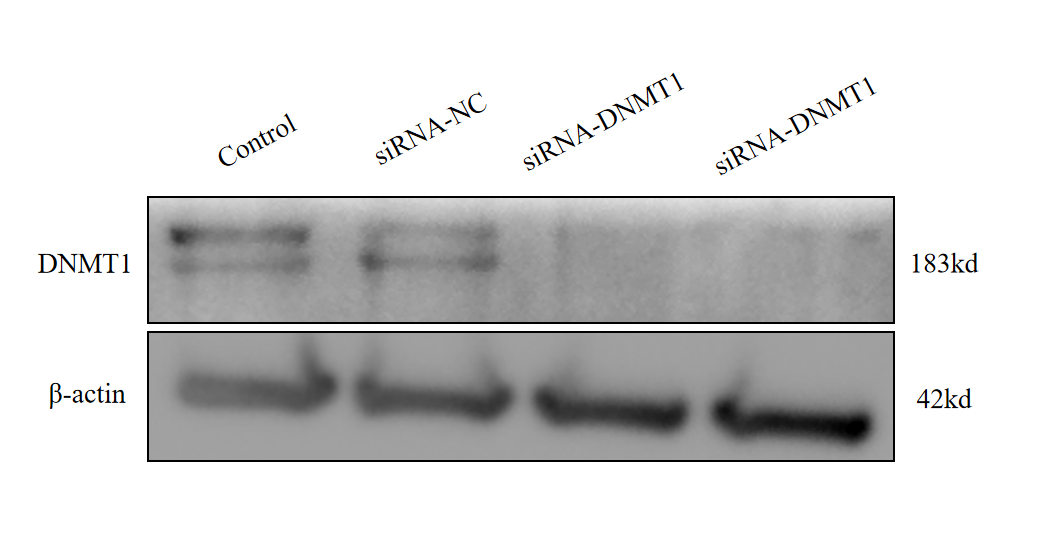

Supplement: Supplementary file 1 [file 2dd3fd1e753707dc9f1be088.docx]
